# Supplementary material
Source: Springer Nature journal article supplement (https://www.springermedizin.de/resource/supplementary/13018_2010_252_MOESM14_ESM.pdf/9636630)

Review: Is Surgical Intervention More Effective Than Non-surgical Treatment for CTS  
 Comparison: 07 Surgery vs non-surgery: Improvement in electrophysiological test at 6 months  
 Outcome: 02 Number of normal nerve studies after the intervention

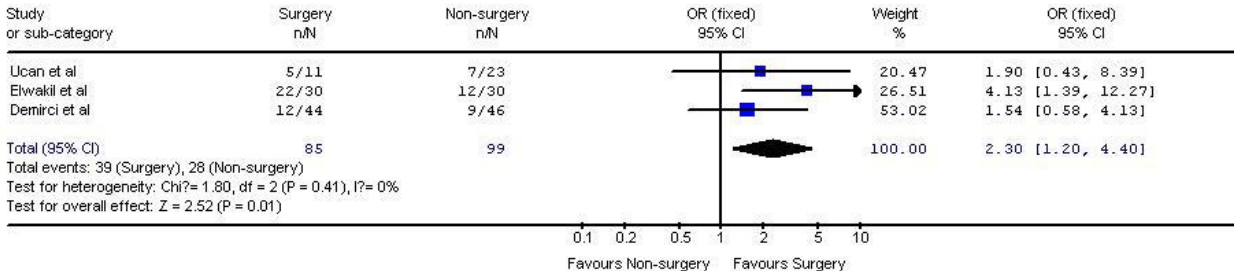

Supplement: MOESM14 [file 9636630]
